# Supplementary material for: Polymyxin B containing polyion complex (PIC) nanoparticles: Improving the antimicrobial activity by tailoring the degree of polymerisation of the inert component
Source: PubMed Central journal article supplement (PMC5570901; doi:10.1038/s41598-017-09667-3), 2017-08-24
Supplement: 41598_2017_9667_MOESM1_ESM.pdf [file 41598_2017_9667_MOESM1_ESM.pdf]

# Polymyxin B containing polyion complex (PIC) nanoparticles: Improving the antimicrobial activity by tailoring the degree of polymerisation of the inert component

Ignacio Insua,<sup>a,c</sup> Laimdota Zizmare,<sup>a,c</sup> Anna F. A. Peacock,<sup>a</sup> Anne Marie Krachler,<sup>b,c,§</sup> and Francisco Fernandez-Trillo\*<sup>a</sup>,

<sup>a</sup>School of Chemistry, <sup>b</sup>School of Biosciences and <sup>c</sup>Institute of Microbiology and Infection, University of Birmingham, B15 2TT Birmingham, UK

§ Current address: Department of Microbiology and Molecular Genetics, University of Texas McGovern Medical School at Houston, Houston, TX, 77030, USA.

## TABLE OF CONTENTS

|                                                                                               |                 |
|-----------------------------------------------------------------------------------------------|-----------------|
| <b><u>1. CHARACTERISATION OF PIC NANOPARTICLES .....</u></b>                                  | <b><u>2</u></b> |
| 1.1. SIZE AND CHARGE.....                                                                     | 2               |
| 1.2. ADDITIONAL TEM MICROSCOPY .....                                                          | 3               |
| <b><u>2. STABILITY OF PIC NANOPARTICLES UNDER SIMULATED PHYSIOLOGICAL CONDITIONS.....</u></b> | <b><u>4</u></b> |
| <b><u>3. DIFFUSION OF POL-B ACROSS DIALYSIS MEMBRANES.....</u></b>                            | <b><u>7</u></b> |
| <b><u>4. ANTIMICROBIAL ACTIVITY OF PSS AND POL-B.....</u></b>                                 | <b><u>8</u></b> |
| 4.1. CONTROL GROWTH CURVES .....                                                              | 8               |

## 1. CHARACTERISATION OF PIC NANOPARTICLES

### 1.1. Size and charge

**Table S1.** Hydrodynamic diameter ( $D_H$ ) and  $\zeta$ -potential of PIC nanoparticles prepared from six different polymers in combination with Pol-B at ten different [n+/n-] ratios.

| Polymer          | [n+/n-] ratio | $D_H \pm SD$ (nm) | Pdl <sup>b</sup> | $\zeta$ -potential $\pm SD$ (mV) <sup>a</sup> | Notes        |
|------------------|---------------|-------------------|------------------|-----------------------------------------------|--------------|
| PSS <sub>H</sub> | 1.0           | -                 | -                | -                                             | Flocculation |
|                  | 0.9           | -                 | -                | -                                             | Flocculation |
|                  | 0.8           | -                 | -                | -                                             | Flocculation |
|                  | 0.7           | 199 $\pm$ 58      | 0.08             | -55.1 $\pm$ 10.7                              | -            |
|                  | 0.6           | 194 $\pm$ 58      | 0.09             | -54.7 $\pm$ 9.9                               | -            |
|                  | 0.5           | 196 $\pm$ 61      | 0.10             | -56.8 $\pm$ 10.4                              | -            |
|                  | 0.4           | 193 $\pm$ 67      | 0.12             | -51.4 $\pm$ 12.4                              | -            |
|                  | 0.3           | 190 $\pm$ 60      | 0.10             | -52.7 $\pm$ 9.2                               | -            |
|                  | 0.2           | 193 $\pm$ 71      | 0.14             | -50.3 $\pm$ 11.0                              | -            |
|                  | 0.1           | 182 $\pm$ 58      | 0.10             | -46.6 $\pm$ 14.2                              | -            |
| PSS <sub>M</sub> | 1.0           | -                 | -                | -                                             | Flocculation |
|                  | 0.9           | -                 | -                | -                                             | Flocculation |
|                  | 0.8           | 201 $\pm$ 57      | 0.08             | -49.5 $\pm$ 7.3                               | -            |
|                  | 0.7           | 202 $\pm$ 61      | 0.09             | -48.5 $\pm$ 8.5                               | -            |
|                  | 0.6           | 197 $\pm$ 59      | 0.09             | -50.0 $\pm$ 8.8                               | -            |
|                  | 0.5           | 202 $\pm$ 73      | 0.13             | -49.8 $\pm$ 7.9                               | -            |
|                  | 0.4           | 197 $\pm$ 62      | 0.10             | -49.5 $\pm$ 9.1                               | -            |
|                  | 0.3           | 192 $\pm$ 55      | 0.08             | -49.6 $\pm$ 9.3                               | -            |
|                  | 0.2           | 179 $\pm$ 62      | 0.12             | -48.1 $\pm$ 9.7                               | -            |
|                  | 0.1           | 180 $\pm$ 65      | 0.13             | -49.2 $\pm$ 9.6                               | -            |
| PSS <sub>L</sub> | 1.0           | -                 | -                | -                                             | Flocculation |
|                  | 0.9           | -                 | -                | -                                             | Flocculation |
|                  | 0.8           | 196 $\pm$ 60      | 0.09             | -45.7 $\pm$ 9.3                               | -            |
|                  | 0.7           | 201 $\pm$ 72      | 0.13             | -46.5 $\pm$ 8.1                               | -            |
|                  | 0.6           | 189 $\pm$ 49      | 0.07             | -46.7 $\pm$ 7.1                               | -            |
|                  | 0.5           | 194 $\pm$ 68      | 0.12             | -48.9 $\pm$ 8.9                               | -            |
|                  | 0.4           | 193 $\pm$ 60      | 0.10             | -49.5 $\pm$ 9.2                               | -            |
|                  | 0.3           | 186 $\pm$ 56      | 0.09             | -46.8 $\pm$ 8.0                               | -            |
|                  | 0.2           | 185 $\pm$ 56      | 0.09             | -48.0 $\pm$ 9.2                               | -            |
|                  | 0.1           | 182 $\pm$ 53      | 0.08             | -47.9 $\pm$ 9.4                               | -            |

<sup>a</sup> SD indicates the standard deviation found for the only size or charge population fitted by the software.

<sup>b</sup> Polydispersity Index (Pdl) calculated using the formula:  $Pdl = (SD/D_H)^2$ .

## 1.2. Additional TEM microscopy

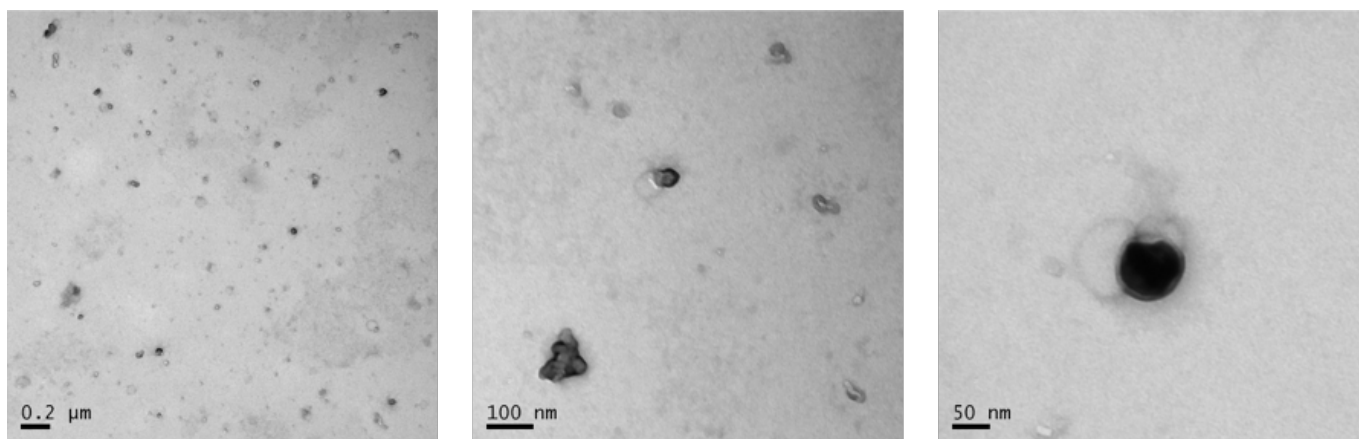

**Fig. S1** TEM micrographs of PIC nanoparticles prepared from Pol-B and PSS<sub>L</sub> at a 0.4 [n+/n-] ratio.

**2. STABILITY OF PIC NANOPARTICLES UNDER SIMULATED PHYSIOLOGICAL CONDITIONS**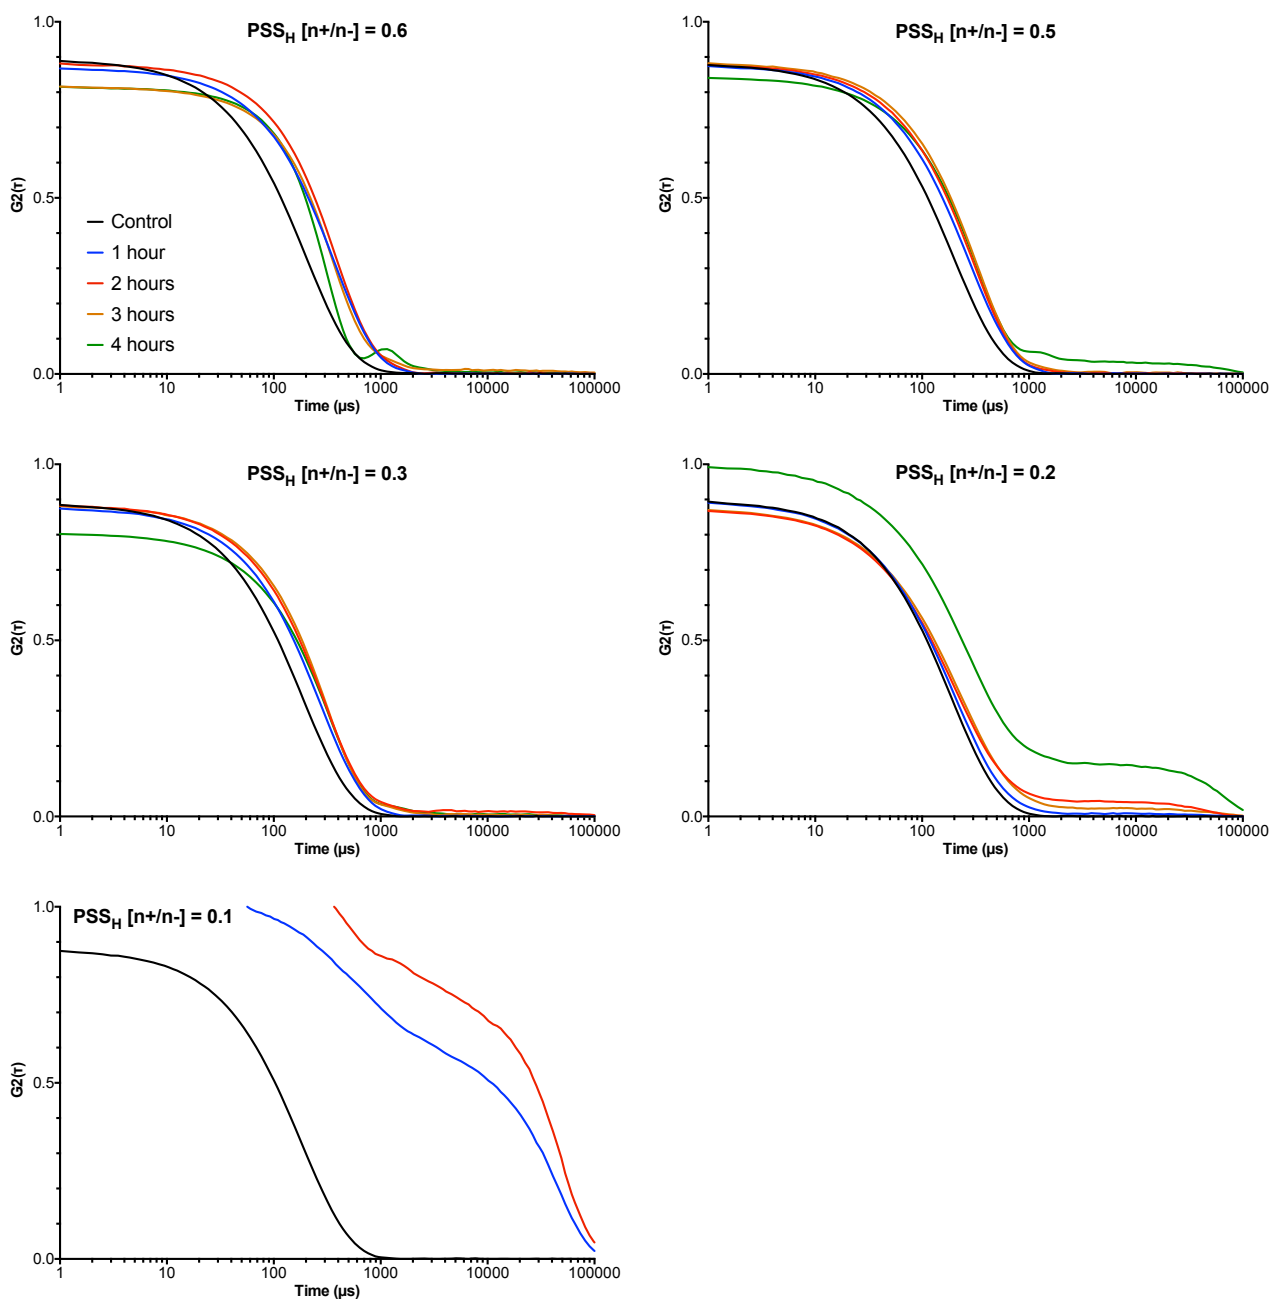

**Fig. S2** DLS autocorrelation function (ACF) curves of PIC nanoparticles prepared from PSS<sub>H</sub> at different [n<sup>+</sup>/n<sup>-</sup>] ratios in the absence (control) and presence of 154 mM NaCl over time (1-4 hours).

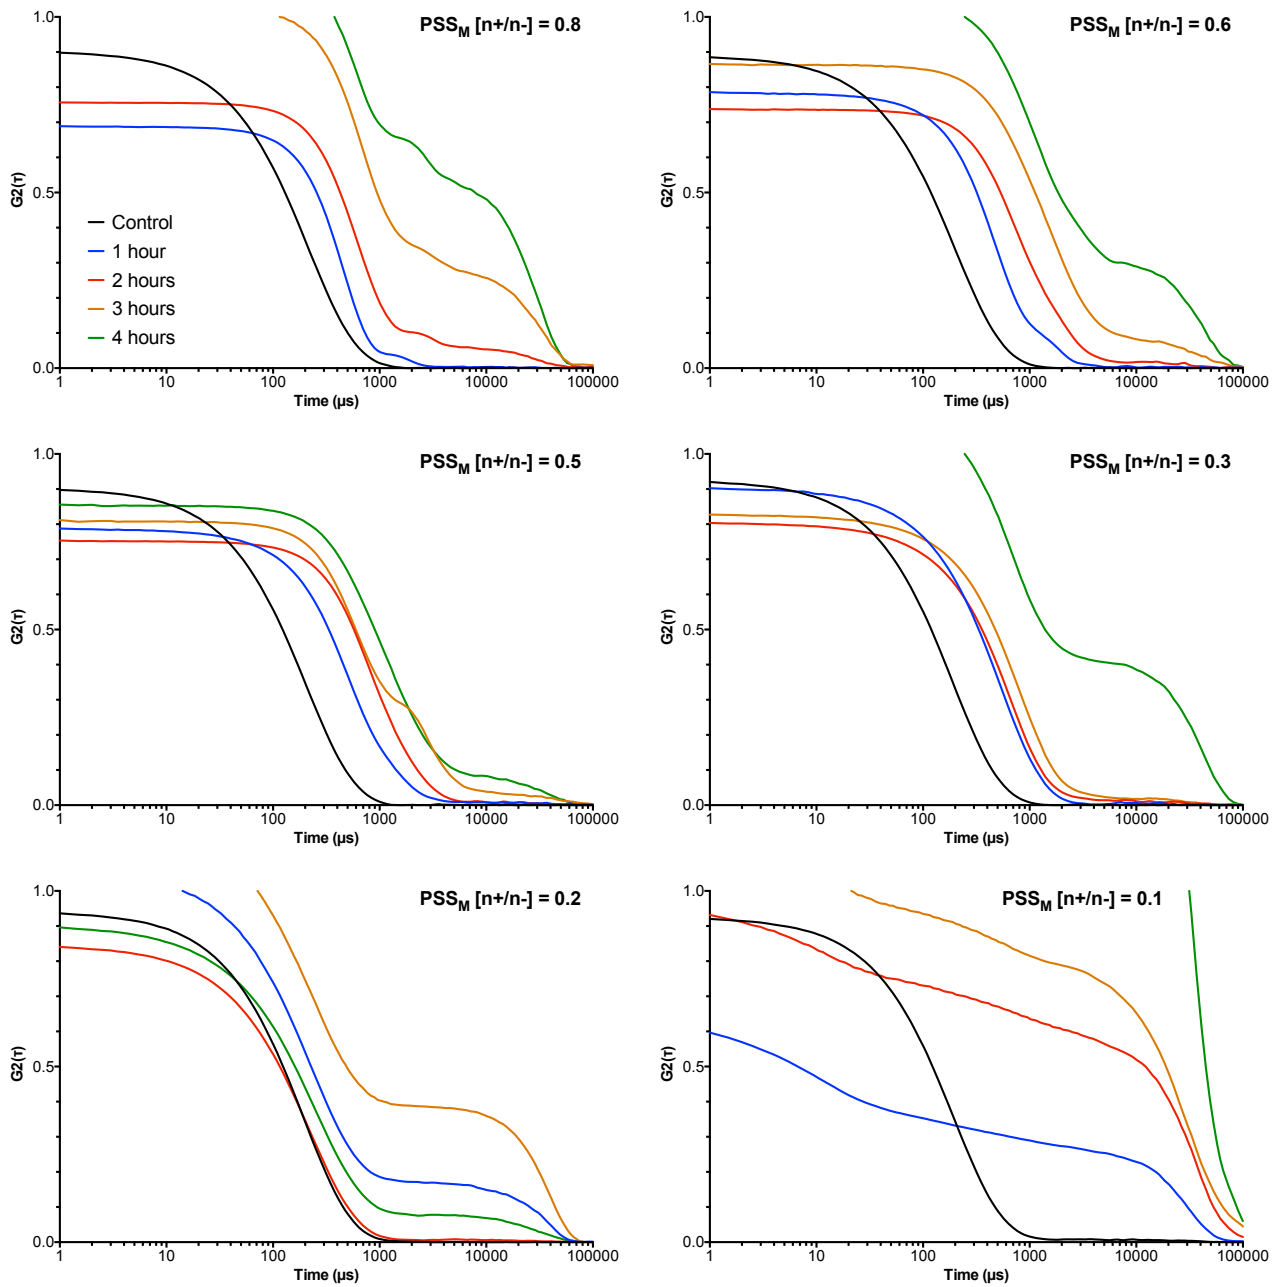

**Fig. S3** DLS autocorrelation function (ACF) curves of PIC nanoparticles prepared from PSS<sub>M</sub> at different [n<sup>+</sup>/n<sup>-</sup>] ratios in the absence (control) and presence of 154 mM NaCl over time (1-4 hours).

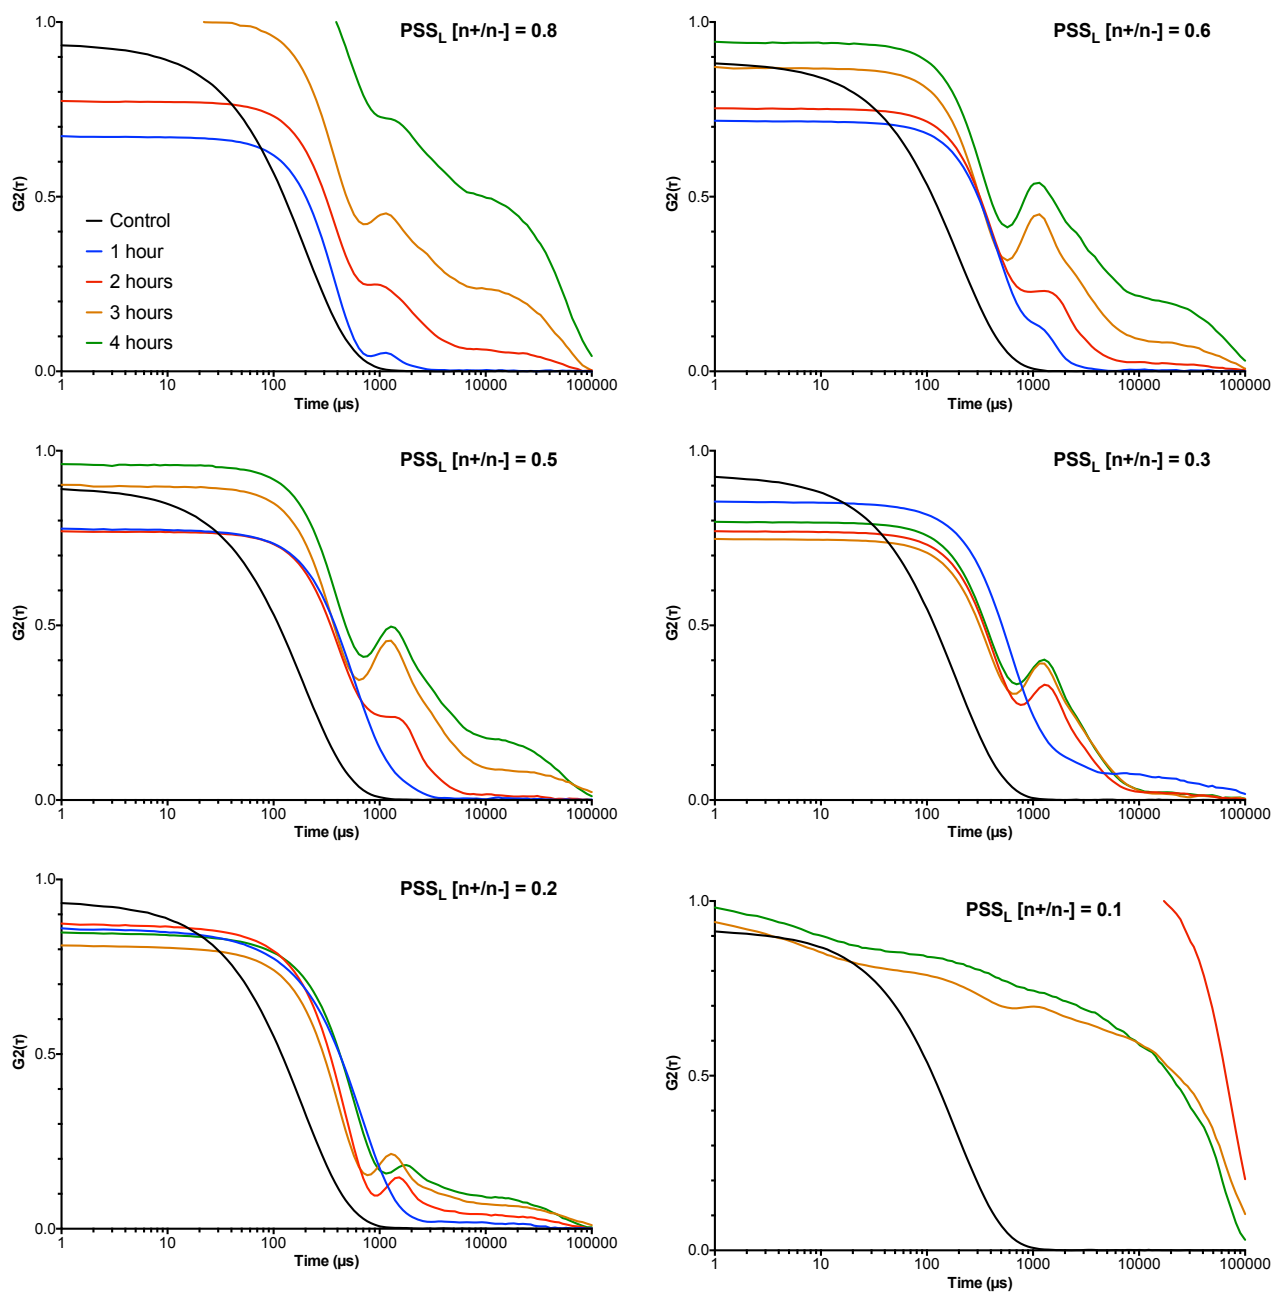

**Fig. S4** DLS autocorrelation function (ACF) curves of PIC nanoparticles prepared from PSS<sub>L</sub> at different [n<sup>+</sup>/n<sup>-</sup>] ratios in the absence (control) and presence of 154 mM NaCl over time (1-4 hours).

### 3. DIFFUSION OF POL-B ACROSS DIALYSIS MEMBRANES

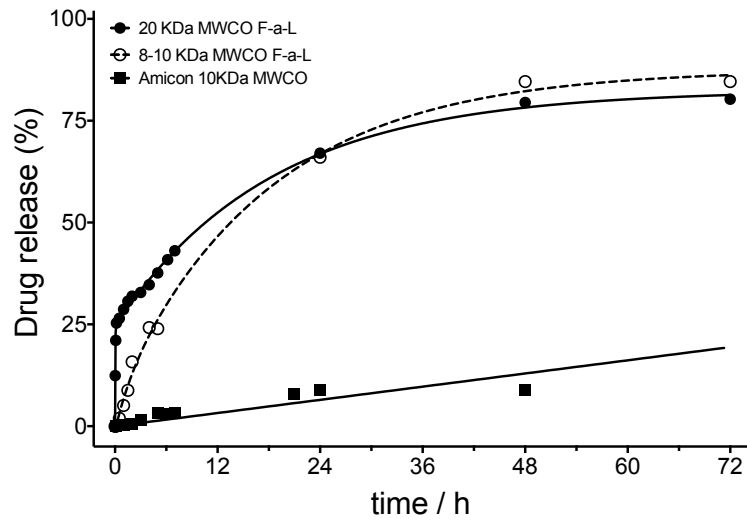

**Fig. S5** Pol-B content found in the dialysate of 175  $\mu\text{M}$  solutions of Pol-B in 5 mM HEPES buffer at pH 7.4. Content was normalised to that found in a 175  $\mu\text{M}$  Pol-B sample (drug loading in these PIC nanoparticles) diluted down to the total dialysis volume (100%).  $n = 3$ .

#### 4. ANTIMICROBIAL ACTIVITY OF PSS AND POL-B

##### 4.1. Control growth curves

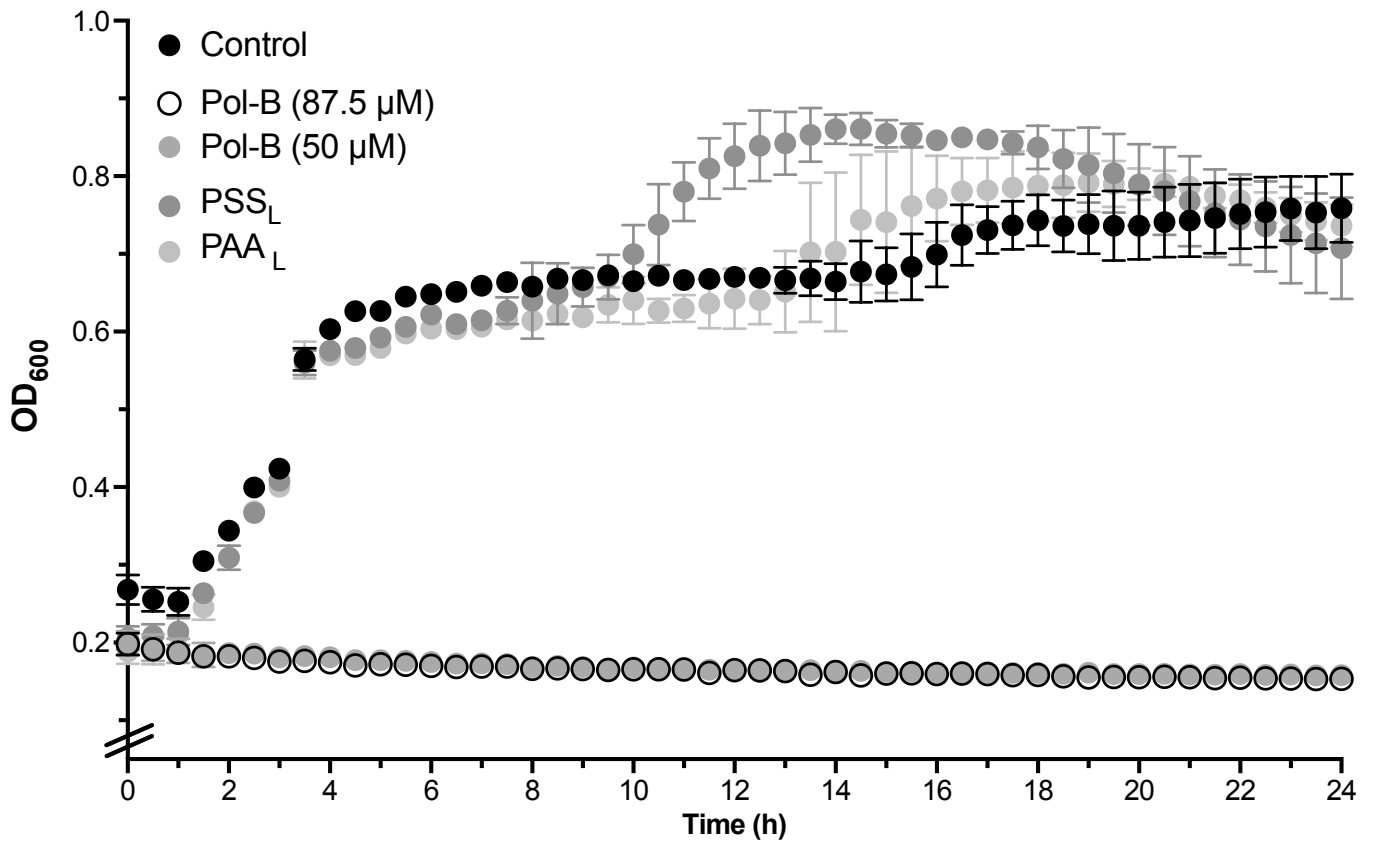

**Fig. S6** Change in optical density at 600 nm ( $OD_{600}$ ) for *P. aeruginosa* cultures in the absence (●) and presence of Pol-B,  $PSS_L$ ,  $PSS_H$ . Error bars represent the standard deviation,  $n = 3$ .
